# Supplementary material for: High-Throughput and Cost-Effective Characterization of Induced Pluripotent Stem Cells
Source: PubMed Central journal article supplement (PMC5390243; doi:10.1016/j.stemcr.2017.03.011), 2017-04-06
Supplement: mmc1.pdf [file mmc1.pdf]

**Stem Cell Reports, Volume 8**

**Supplemental Information**

**High-Throughput and Cost-Effective Characterization of Induced Pluripotent Stem Cells**

**Matteo D'Antonio, Grace Woodruff, Jason L. Nathanson, Agnieszka D'Antonio-Chronowska, Angelo Arias, Hiroko Matsui, Roy Williams, Cheryl Herrera, Sol M. Reyna, Gene W. Yeo, Lawrence S.B. Goldstein, Athanasia D. Panopoulos, and Kelly A. Frazer**

**Supplemental information includes Figure S1, Tables S1-S6 and Data S1.**

## Supplemental Figure

**Figure S1. Differences between low- and high-quality barcoded iPSCs, related to Figure 3.**

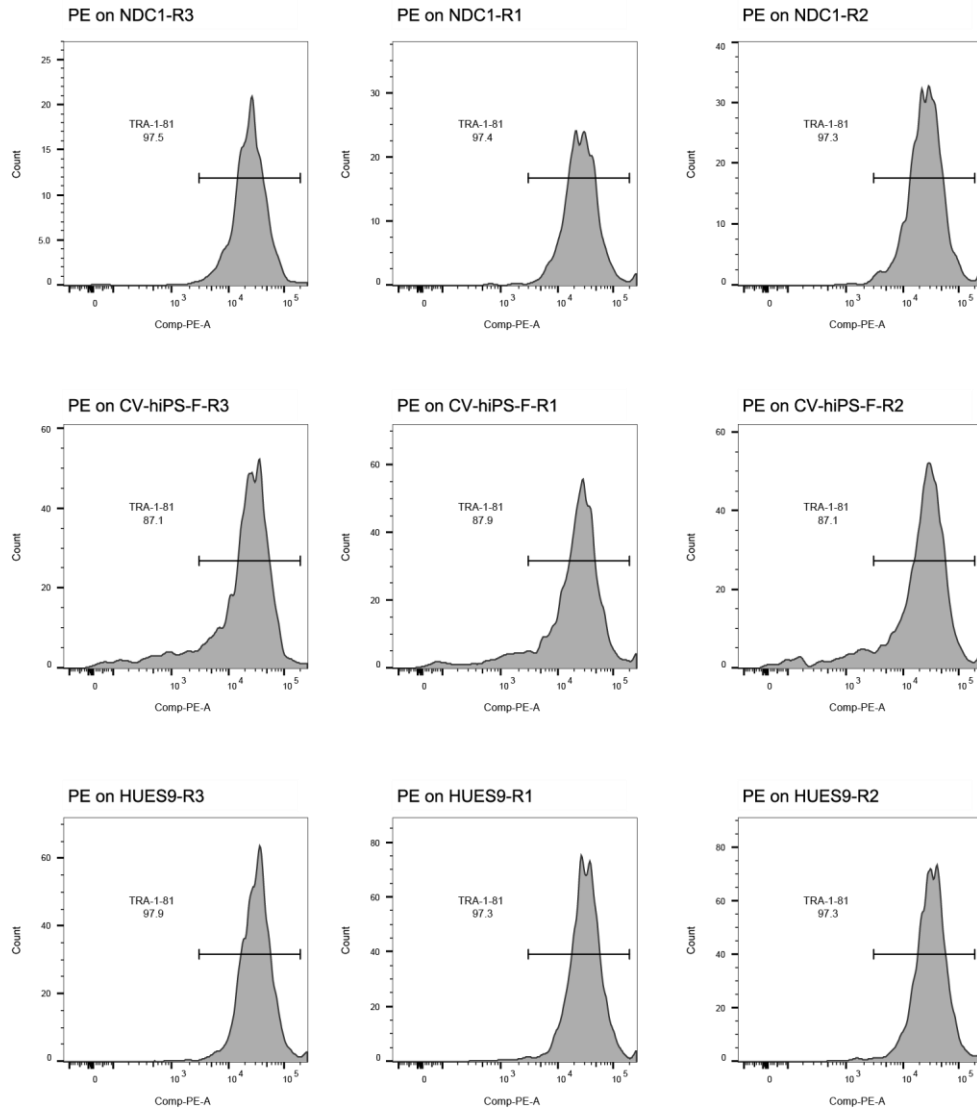

Shown are the histograms of TRA-1-81<sup>+</sup> cells for the three replicates of the three lines analyzed in Figure 3. A lower percentage of cells staining positive for TRA-1-81<sup>+</sup> in the CV-hiPS-F line (middle row) is in agreement with previous characterization of its quality (Gore et al., 2011), and confirms that FCB allows the distinction between low- and high-quality iPSCs.

## Supplemental Tables

### **Table S1. Description of all lines used for qPCR, related to Figure 4.**

The table shows the list of 122 lines used for qPCR. Column C shows the 12 samples that did not pass QC (five iPSCs and one EB, as well as their associated five EBs and one iPSC line) and were not included in PCA (Figure 4).

### **Table S2. List of primers used for qPCR, related to Figure 4.**

Shown is the list of all 68 primer pairs (4 housekeeping genes and 64 pluripotency or germ layer markers) used for qPCR. For each primer pair, the lineage where its associated gene is expressed is displayed (column B). Column C shows the 12 primer pairs that were selected for 12-gene qPCR to calculate each germ layer scores (Figure 4).

### **Table S3. Ct values detected by qPCR, related to Figure 4.**

Shown are the raw Ct values of all 68 primer pairs in the 110 samples that underwent qPCR and passed all quality filters and were used for PCA.

### **Table S4. Genomic position of all variants in trisomic chromosomes, related to Figure 5.**

Shown is the probe ID assigned by Illumina and the genomic position for all 50,076 probes in the trisomic chromosomes (12, 13, 14, 17, 20).

### **Table S5. Log r ratio for all variants in trisomic chromosomes, related to Figure 5.**

Shown is the log r ratio associated with the probes described in Table S4 for CV-hiPS-B, CV-hiPS-F and the serial dilutions.

### **Table S6. B allele frequency for all variants in trisomic chromosomes, related to Figure 5.**

Shown is the B allele frequency associated with the probes described in Table S4 for CV-hiPS-B, CV-hiPS-F and the serial dilutions.

## Supplemental Data

### **Data S1. Calculation of pluripotency and germ layer scores, related to Figure 4.**

This Excel sheet allows the user to calculate pluripotency and germ layer scores by providing raw Ct values of 17 genes (four pluripotency markers, four markers for each germ layer and one housekeeping gene) as input. The 12 genes for the three germ layer scores were chosen based on analyses in this manuscript (Figure 4). The four pluripotency markers are from our previous publication (Gore et al., 2011; Liu et al., 2011).

To run the analysis, users will need to: 1) enter sample names in cells A4-A99 (highlighted in blue); 2) enter gene names in cells B3-R3 (highlighted in blue); 3) enter the raw Ct values for the housekeeping gene to be used for normalization in cells B4-B99 (highlighted in green); and 4) enter raw Ct values for the marker genes in cells C4-R99 (highlighted in yellow).

Columns T-AJ show  $\Delta Ct$  values, calculated as  $\Delta Ct_{gene} = 2^{(Ct_{housekeeping} - Ct_{gene})}$ . Columns AL-BB show normalized expression levels (to values included between zero and one), calculated as  $e_{gene} = \frac{(\Delta Ct_{gene} - \min(\Delta Ct_{gene}))}{(\max(\Delta Ct_{gene}) - \min(\Delta Ct_{gene}))}$ . The output scores are shown in cells BD2-BH99, while the corresponding heatmap is shown in cells BJ2-BN99.

For demonstrative purposes, two example datasets are provided for the user to test the Data S1 Excel sheet. Dataset 1 is provided to test calculating a pluripotency score, the Excel sheet is populated with raw Ct values from five samples (including two ESCs, two iPSCs and one fibroblast) that have been previously characterized (Gore et al., 2011; Liu et al., 2011). Dataset 2 is provided to test germ-layer scores, the Excel sheet is populated with raw Ct values from nine samples (three ESCs, three iPSCs and their associated EBs) generated in this manuscript.

Below are the two example datasets provided for the user to test the Data S1 Excel sheet:

Dataset 1: Five samples assessed for four pluripotency markers (Gore et al., 2011; Liu et al., 2011). The user pastes these sample names, gene names and raw Ct values of each gene into Data S1 Excel sheet.

| Sample name         | Housekeeping gene | Pluripotent |          |        |        |
|---------------------|-------------------|-------------|----------|--------|--------|
|                     | GAPDH             | End-OCT4    | End-SOX2 | NANOG  | CRIPTO |
| H1 (ES Line)        | 14.500            | 18.820      | 18.000   | 19.000 | 17.000 |
| H9 (ES line)        | 14.670            | 17.000      | 18.000   | 19.000 | 17.000 |
| FiPS4F2 (iPS line)  | 13.950            | 18.000      | 18.000   | 20.000 | 17.000 |
| FiPS4F5 (iPS line)  | 15.860            | 19.000      | 20.000   | 20.000 | 18.000 |
| IMR90 (Fibroblasts) | 14.500            | 23.000      | 31.000   | 27.000 | 29.000 |

Dataset 2: Nine samples with 12 germ layer markers (four for each germ layer). The user pastes these sample names, gene names and raw Ct values of each gene into Data S1 Excel sheet.

| Sample name   | Housekeeping gene | Ectoderm |        |        |        |
|---------------|-------------------|----------|--------|--------|--------|
|               | RPS29             | ALDH1A1  | COL1A1 | PAX6   | DCX    |
| ES.HUES16 p50 | 2.500             | 13.310   | 8.925  | 13.901 | 14.302 |
| ES.HUES9 p39  | 3.364             | 15.790   | 10.500 | 20.077 | 14.460 |
| ES.H9 p54     | 2.500             | 14.285   | 11.136 | 16.280 | 13.530 |
| IPS.F2.11     | 3.146             | 14.796   | 9.321  | 13.168 | 15.250 |
| IPS.F2.24     | 3.811             | 16.486   | 8.934  | 14.849 | 15.706 |
| IPS.F1.21     | 3.728             | 15.662   | 8.790  | 14.514 | 15.975 |
| EB.F1.21      | 4.771             | 13.870   | 8.422  | 15.564 | 15.442 |
| EB.F2.11      | 4.537             | 11.970   | 8.011  | 14.046 | 15.820 |
| EB.F2.24      | 5.323             | 14.977   | 9.229  | 15.074 | 17.497 |

| Sample name   | Housekeeping gene | Endoderm |         |        |        |
|---------------|-------------------|----------|---------|--------|--------|
|               | RPS29             | AFP      | GATA1   | SOX7   | CDH1   |
| ES.HUES16 p50 | 2.500             | 13.320   | 20.451  | 16.000 | 12.768 |
| ES.HUES9 p39  | 3.364             | 25.800   | 20.192  | 16.588 | 13.490 |
| ES.H9 p54     | 2.500             | 999.000  | 23.679  | 14.778 | 12.333 |
| IPS.F2.11     | 3.146             | 16.445   | 999.000 | 16.368 | 12.778 |
| IPS.F2.24     | 3.811             | 18.758   | 21.379  | 17.129 | 12.580 |
| IPS.F1.21     | 3.728             | 13.694   | 21.679  | 17.002 | 12.999 |
| EB.F1.21      | 4.771             | 5.948    | 20.712  | 14.518 | 12.844 |
| EB.F2.11      | 4.537             | 3.869    | 16.835  | 13.737 | 11.062 |
| EB.F2.24      | 5.323             | 6.852    | 999.000 | 14.907 | 11.805 |

| Sample name   | Housekeeping gene | Mesoderm |        |        |        |
|---------------|-------------------|----------|--------|--------|--------|
|               | RPS29             | DCN      | GATA2  | BMP4   | IGF2   |
| ES.HUES16 p50 | 2.500             | 14.114   | 15.979 | 11.766 | 15.107 |
| ES.HUES9 p39  | 3.364             | 21.549   | 17.743 | 13.597 | 17.962 |
| ES.H9 p54     | 2.500             | 20.024   | 17.257 | 13.560 | 19.049 |
| IPS.F2.11     | 3.146             | 13.128   | 16.635 | 12.154 | 13.227 |
| IPS.F2.24     | 3.811             | 23.982   | 17.141 | 13.781 | 16.442 |
| IPS.F1.21     | 3.728             | 19.900   | 14.740 | 11.410 | 14.250 |
| EB.F1.21      | 4.771             | 9.046    | 13.037 | 12.312 | 8.908  |
| EB.F2.11      | 4.537             | 9.188    | 12.863 | 12.255 | 9.764  |
| EB.F2.24      | 5.323             | 10.275   | 12.584 | 13.954 | 10.119 |

## References

- Gore, A., Li, Z., Fung, H.L., Young, J.E., Agarwal, S., Antosiewicz-Bourget, J., Canto, I., Giorgetti, A., Israel, M.A., Kiskinis, E., *et al.* (2011). Somatic coding mutations in human induced pluripotent stem cells. *Nature* 471, 63-67.
- Liu, G.H., Barkho, B.Z., Ruiz, S., Diep, D., Qu, J., Yang, S.L., Panopoulos, A.D., Suzuki, K., Kurian, L., Walsh, C., *et al.* (2011). Recapitulation of premature ageing with iPSCs from Hutchinson-Gilford progeria syndrome. *Nature* 472, 221-225.
